# Supplementary material for: Highly 3,4-selective living polymerization of 2-phenyl-1,3-butadiene with amidino N-heterocyclic carbene ligated rare-earth metal bis(alkyl) complexes
Source: Royal Society of Chemistry journal article supplement (doi:10.1039/c5ra18713c), 2015-01-01
Supplement: c5ra18713c1.pdf [file c5ra18713c1.pdf]

*Supporting Information*

**Highly 3,4-selective living polymerization of 2-phenyl-1,3-butadiene  
with amidino N-heterocyclic carbene ligated rare-earth metal  
bis(alkyl) complexes**

Changuang Yao<sup>1,2</sup>, Hongyan Xie<sup>1,2</sup> and Dongmei Cui<sup>1\*</sup>

<sup>1</sup> State Key Laboratory of Polymer Physics and Chemistry, Changchun Institute of Applied Chemistry, Chinese Academy of Sciences, Changchun 130022, People's Republic of China

<sup>2</sup> University of the Chinese Academy of Sciences, Changchun Branch, Changchun 130022, China.

\* Author to whom correspondence should be addressed; E-mail: [dmcui@ciac.ac.cn](mailto:dmcui@ciac.ac.cn)  
Tel.: +86 (0) 431 85262773; Fax: +86 (0) 431 85262774.

**SFig. 1** <sup>1</sup>H NMR (400M, CDCl<sub>3</sub>, 25 °C) spectrum of 2-PB.

**SFig. 2** <sup>13</sup>C NMR (100M, CDCl<sub>3</sub>, 25 °C) spectrum of 2-PB.

**SFig. 3** <sup>1</sup>H NMR spectrum of complex **2a**.

**SFig. 4** <sup>1</sup>H NMR spectrum of complex **3a**.

**SFig. 5** <sup>1</sup>H NMR (400M, CDCl<sub>3</sub>, 25 °C) spectrum of P(2-PB). (Table 1, entries 2)

**SFig. 6** <sup>1</sup>H NMR (400M, CDCl<sub>3</sub>, 25 °C) spectrum of P(2-PB). (Table 1, entry 4)

**SFig. 7** <sup>1</sup>H NMR (400M, CDCl<sub>3</sub>, 25 °C) spectrum of P(2-PB). (Table 1, entry 10)

**SFig. 8** <sup>13</sup>C NMR (100M, CDCl<sub>3</sub>, 25 °C) spectrum of P(2-PB). (Table 1, entry 10)

**SFig. 9** <sup>1</sup>H NMR (400M, CDCl<sub>3</sub>, 25 °C) spectrum of P(2-PB). (Table 1, entry 11)

**SFig. 10** <sup>13</sup>C NMR (100M, CDCl<sub>3</sub>, 25 °C) spectrum of P(2-PB). (Table 1, entry 11)

**SFig. 11** <sup>1</sup>H NMR (400M, CDCl<sub>3</sub>, 25 °C) spectrum of P(2-PB). (Table 1, entry 12)

**SFig. 12** <sup>13</sup>C NMR (100M, CDCl<sub>3</sub>, 25 °C) spectrum of P(2-PB). (Table 1, entry 12)

**SFig. 13** <sup>1</sup>H NMR (400M, CDCl<sub>3</sub>, 25 °C) spectrum of P(2-PB). (Table 1, entry 13)

**SFig. 14**  $^1\text{H}$  NMR (400M,  $\text{CDCl}_3$ , 25 °C) spectrum of P(2-PB). (Table 1, entry 14)

**SFig. 15** GPC traces of P(2-PB)s (Table 1, entries 1, 5-9)

**STable 1.** Polymerization of 2-PB with  $\text{Lu}/[(\text{Ph}_3\text{C})][(\text{B}(\text{C}_6\text{F}_5)_4)]$ : conversion vs time.

( $[\text{Lu}]_0 = 5.0 \mu\text{mol/mL}$ ,  $[\text{2-PB}]_0/[\text{Lu}]_0 = 200$ , Chlorobenzene, 25 °C).

**SFig. 16** Polymerization of 2-PB with  $\text{Lu}/[(\text{Ph}_3\text{C})][(\text{B}(\text{C}_6\text{F}_5)_4)]$ : conversion vs time.

( $[\text{Lu}]_0 = 5.0 \mu\text{mol/mL}$ ,  $[\text{2PB}]_0/[\text{Lu}]_0 = 200$ , Chlorobenzene, 25 °C).

**SFig. 17** Thermogram of P(2-PB). (Table 1, entry 12)

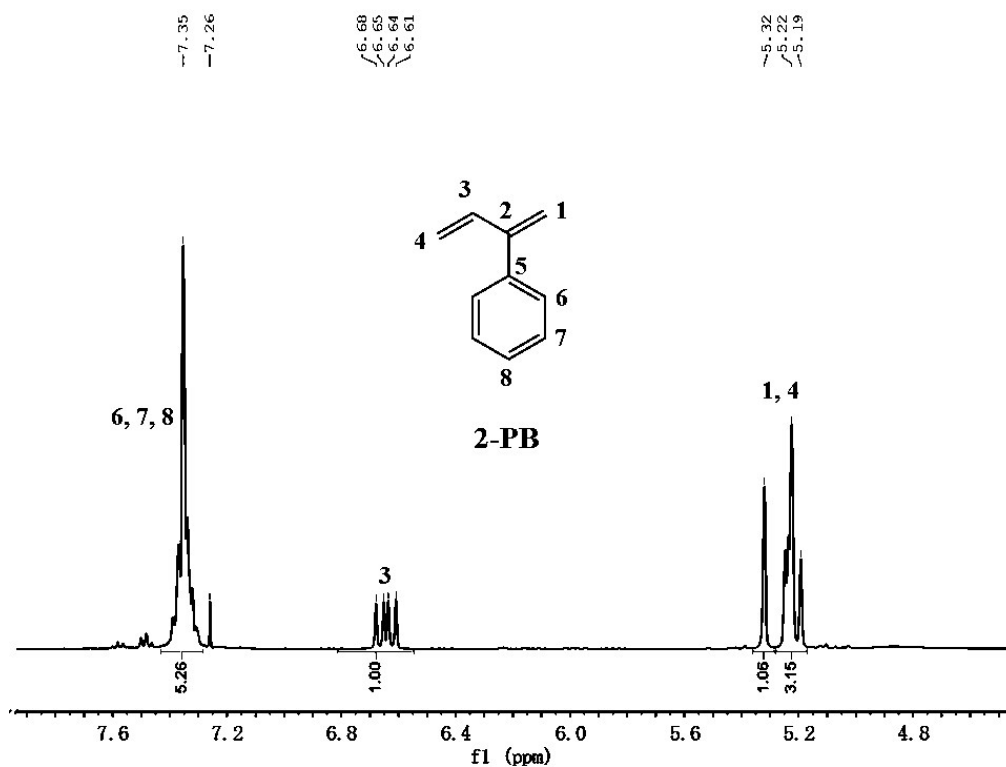

**SFig. 1**  $^1\text{H}$  NMR (400M,  $\text{CDCl}_3$ , 25 °C) spectrum of 2-PB.

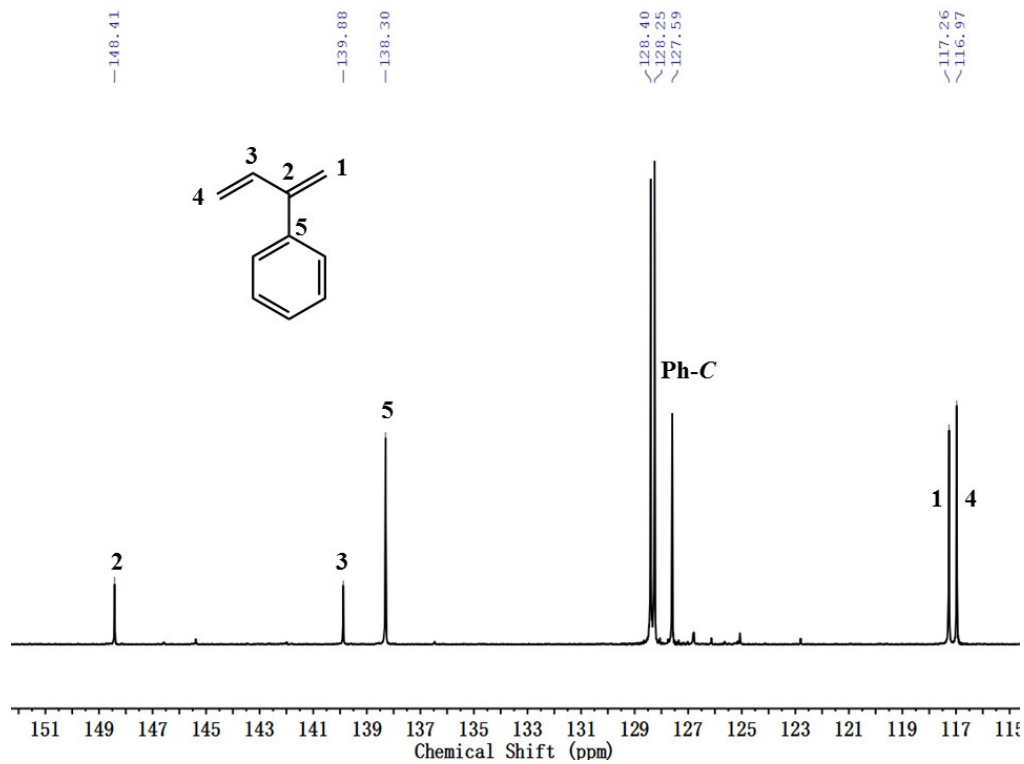

**SFig. 2**  $^{13}\text{C}$  NMR (100M,  $\text{CDCl}_3$ , 25 °C) spectrum of 2-PB.

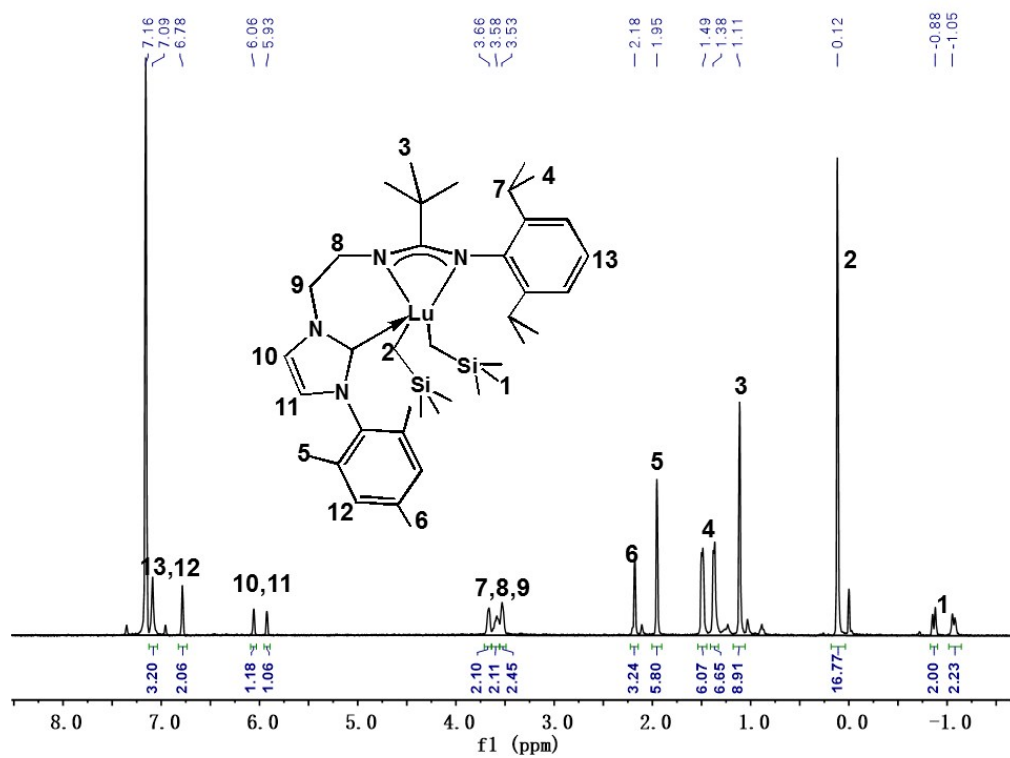

**SFig. 3**  $^1\text{H}$  NMR spectrum of complex **2a**.

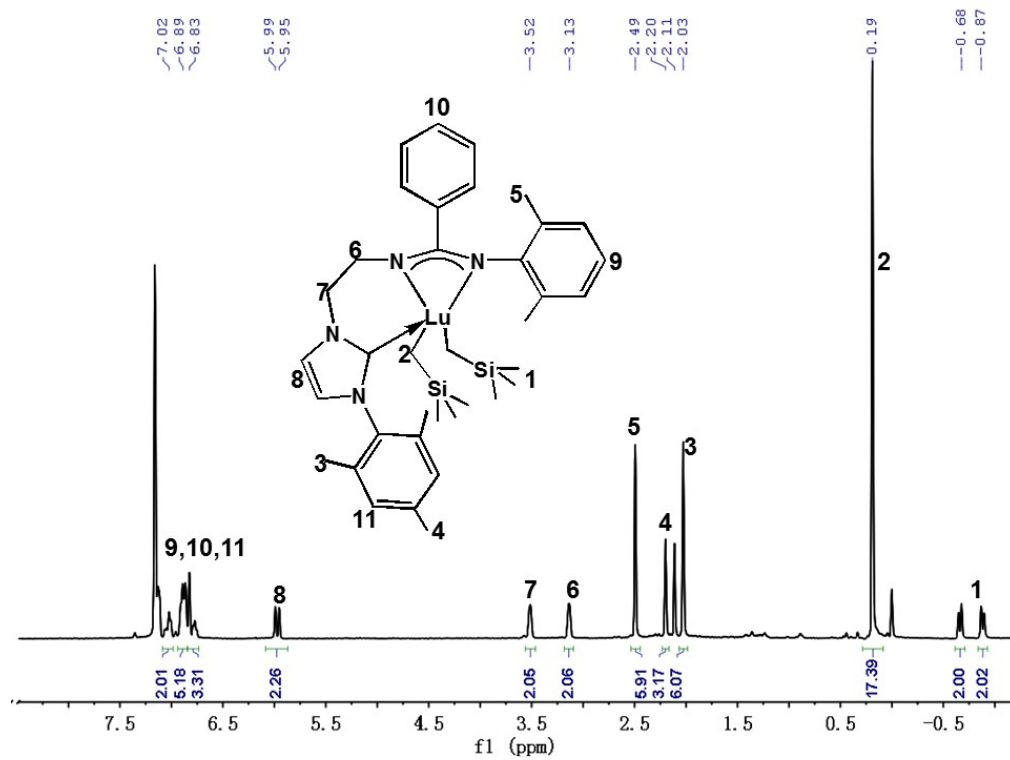

**SFig. 4** <sup>1</sup>H NMR spectrum of complex 3a.

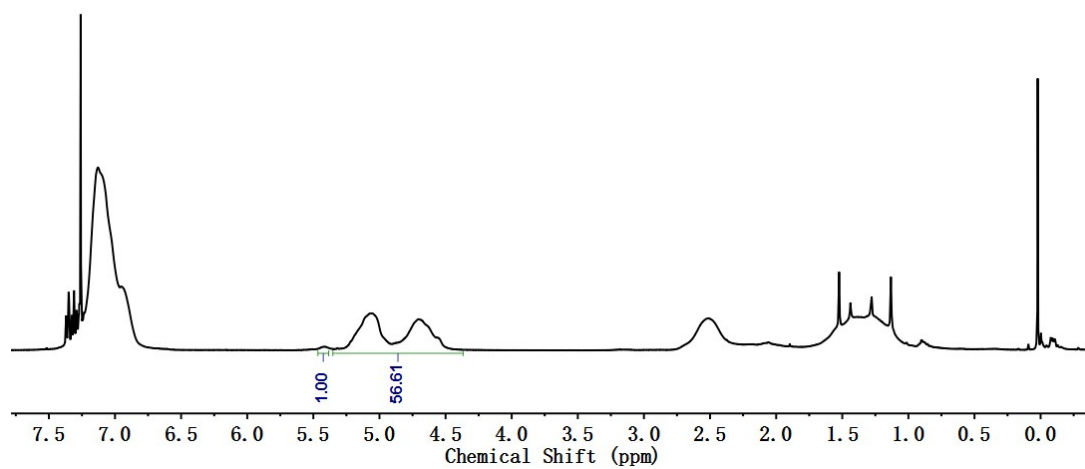

**SFig. 5** <sup>1</sup>H NMR (400M, CDCl<sub>3</sub>, 25 °C) spectrum of P(2-PB). (Table 1, entry 2)

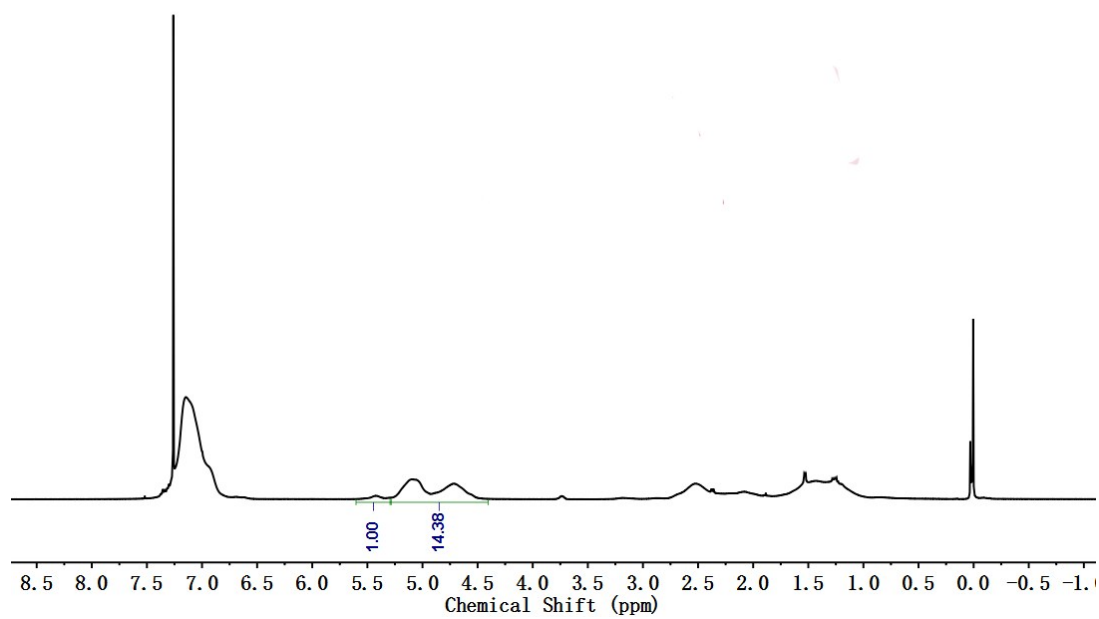

**SFig. 6** <sup>1</sup>H NMR (400M, CDCl<sub>3</sub>, 25 °C) spectrum of P(2-PB). (Table 1, entry 4)

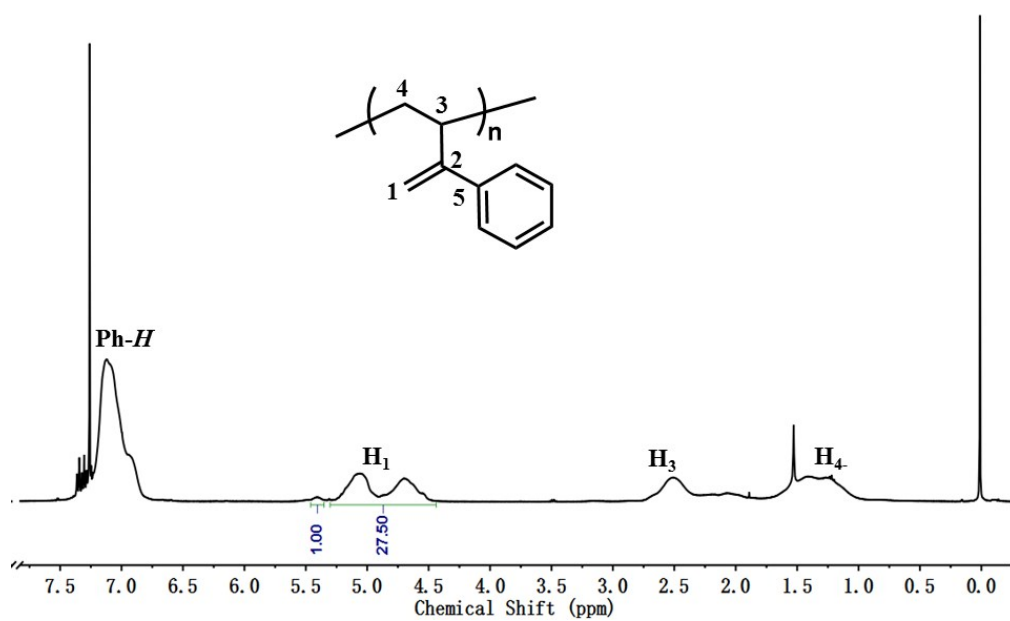

**SFig. 7** <sup>1</sup>H NMR (400M, CDCl<sub>3</sub>, 25 °C) spectrum of P(2-PB). (Table 1, entry 10)

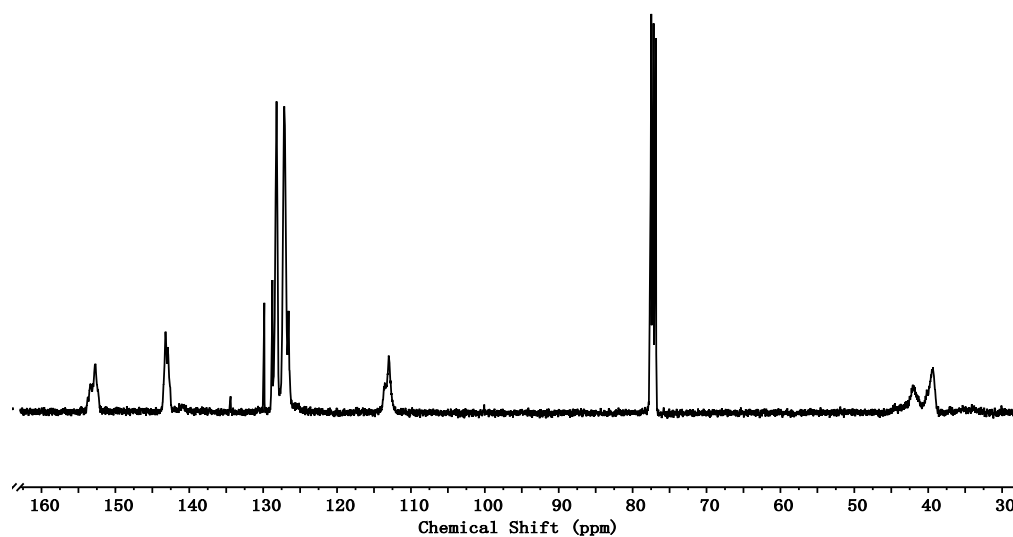

**SFig. 8** <sup>13</sup>C NMR (100M, CDCl<sub>3</sub>, 25 °C) spectrum of P(2-PB).(Table 1, entry 10)

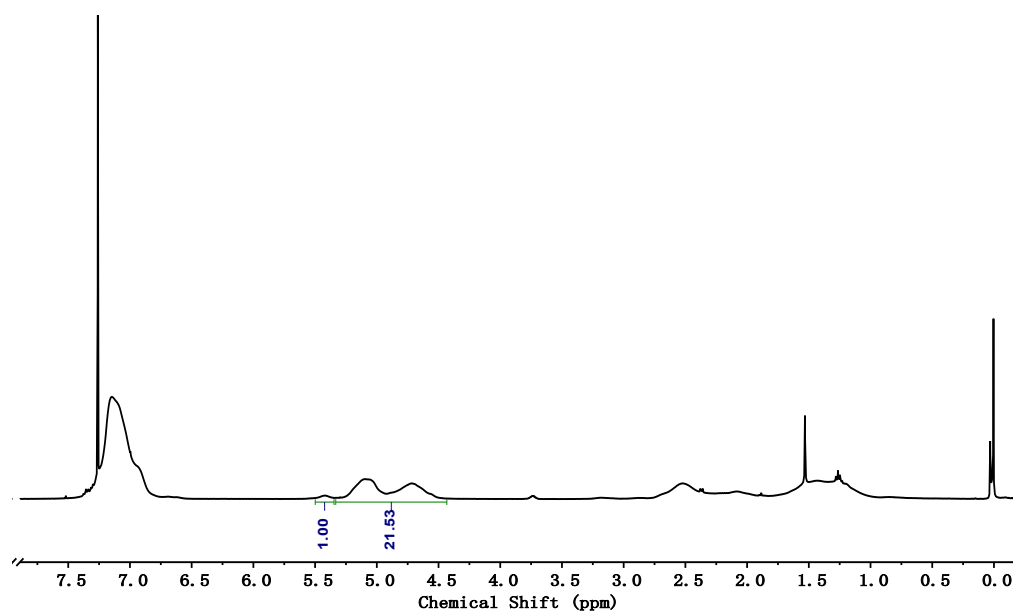

**SFig. 9** <sup>1</sup>H NMR (400M, CDCl<sub>3</sub>, 25 °C) spectrum of P(2-PB).( Table 1, entry 11)

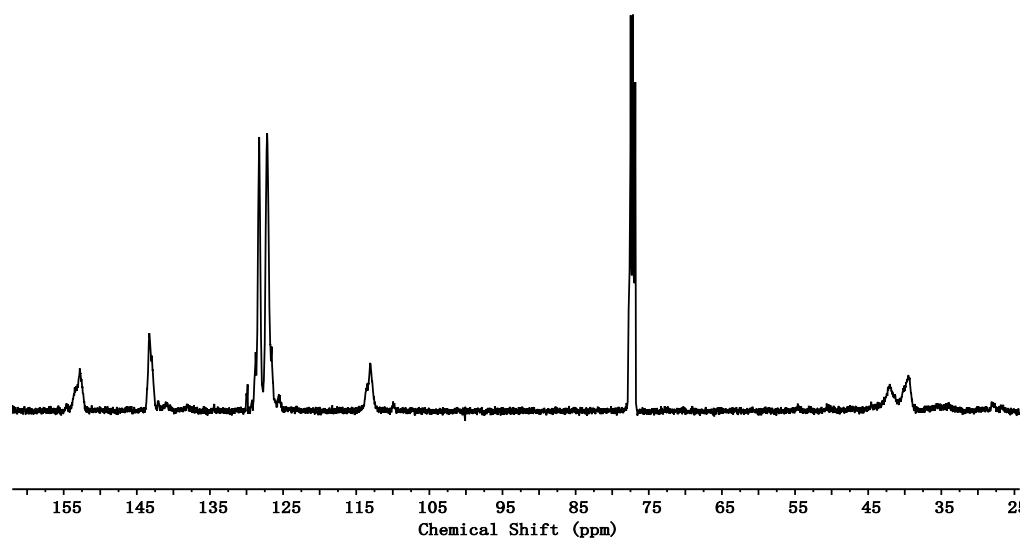

**SFig. 10**  $^{13}\text{C}$  NMR (100M,  $\text{CDCl}_3$ , 25 °C) spectrum of P(2-PB).(Table 1, entry 11)

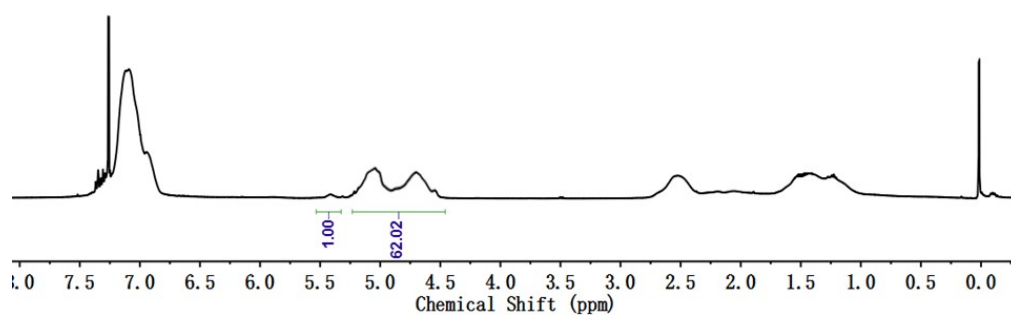

**SFig. 11**  $^1\text{H}$  NMR (400M,  $\text{CDCl}_3$ , 25 °C) spectrum of P(2-PB).( Table 1, entry 12)

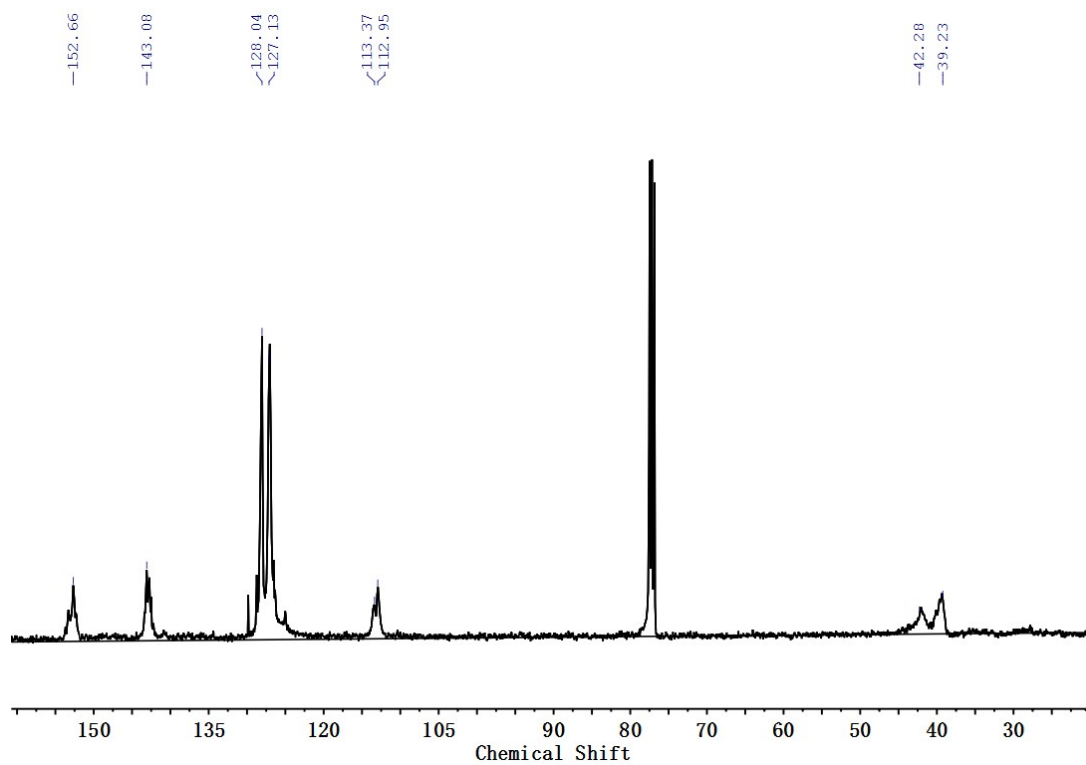

**SFig. 12**  $^{13}\text{C}$  NMR (100M,  $\text{CDCl}_3$ , 25  $^\circ\text{C}$ ) spectrum of P(2-PB).(Table 1, entry 12)

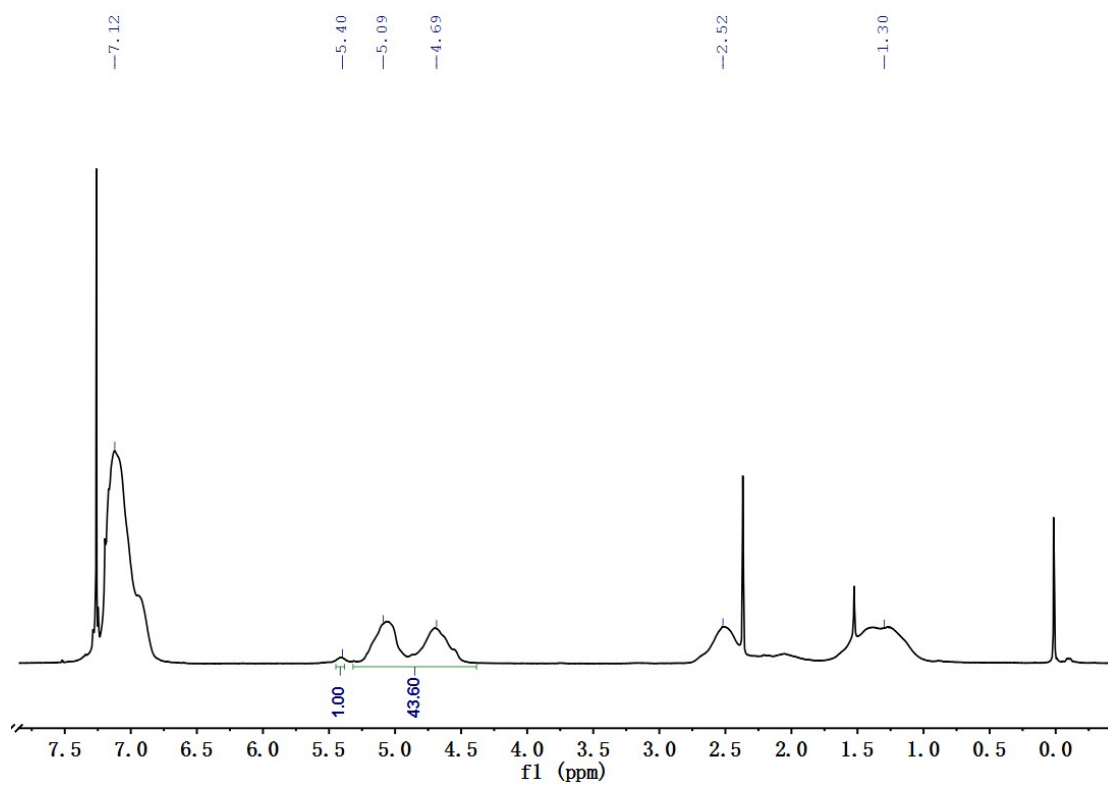

**SFig. 13**  $^1\text{H}$  NMR (400M,  $\text{CDCl}_3$ , 25  $^\circ\text{C}$ ) spectrum of P(2-PB).( Table 1, entry 13)



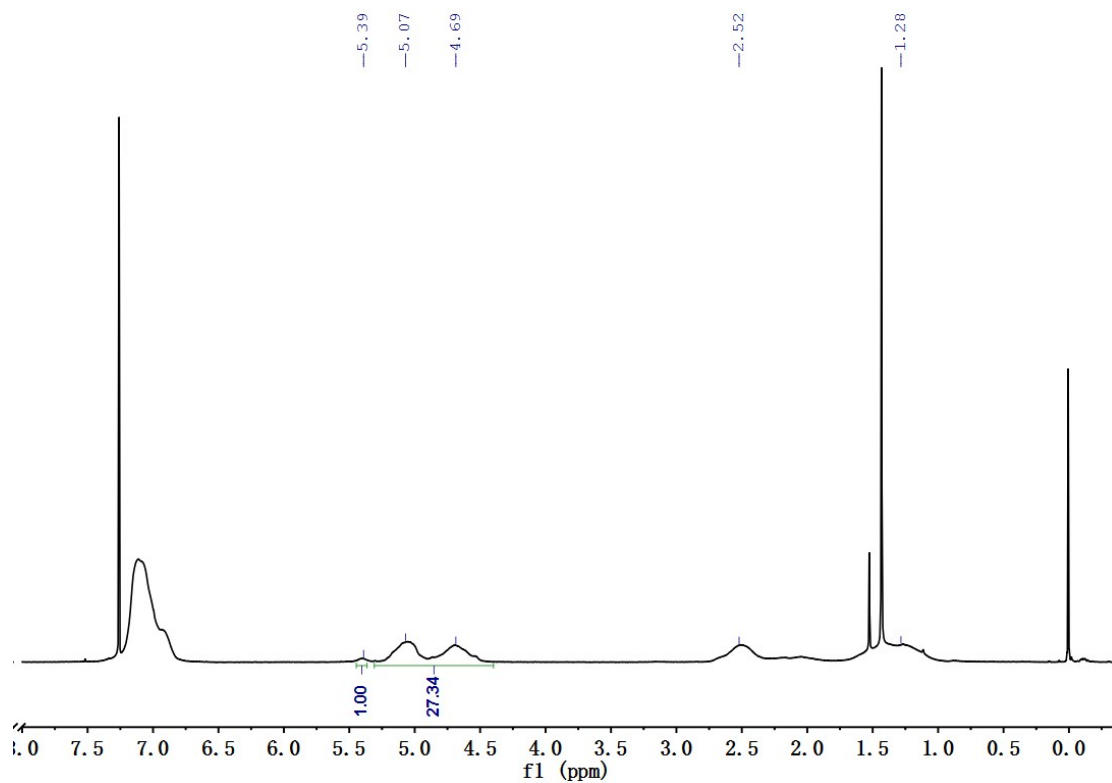

**SFig. 14**  $^1\text{H}$  NMR (400M,  $\text{CDCl}_3$ , 25  $^\circ\text{C}$ ) spectrum of P(2-PB). (Table 1, entry 14)

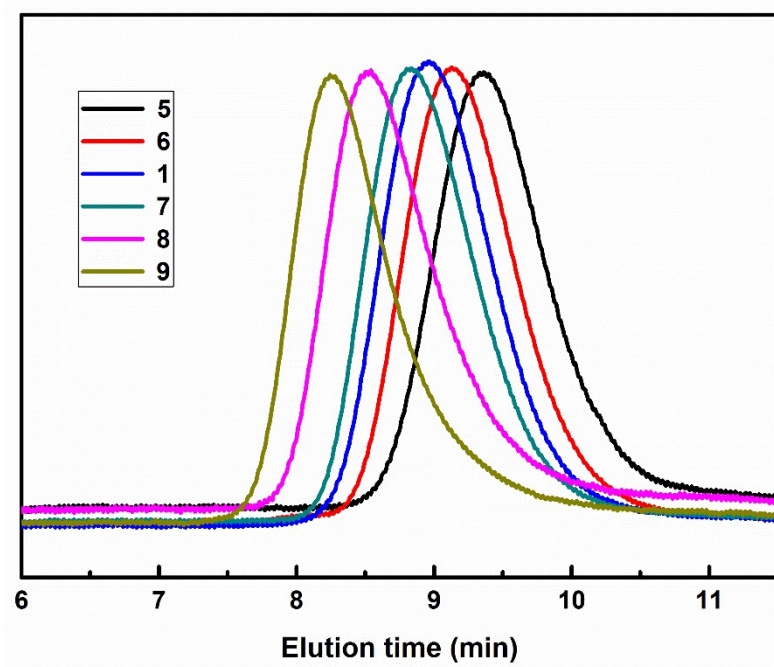

**SFig. 15** GPC traces of P(2-PB)s (Table 1, entries 1, 5-9)

**STable 1.** Polymerization of 2-PB with  $\text{Lu}/[(\text{Ph}_3\text{C})][(\text{B}(\text{C}_6\text{F}_5)_4)]$ : conversion vs time. ( $[\text{Lu}]_0 = 5.0 \mu\text{mol/mL}$ ,  $[\text{2-PB}]_0/[\text{Lu}]_0 = 200$ , Chlorobenzene,  $25 \text{ }^\circ\text{C}$ ).

| Time (min) | Conversion (%) |
|------------|----------------|
| 0          | 0              |
| 5          | 12.4           |
| 10         | 23.2           |
| 20         | 37.3           |
| 30         | 47.0           |
| 50         | 63.7           |
| 70         | 75.0           |
| 90         | 80.8           |
| 120        | 89.7           |
| 150        | 93.5           |
| 180        | 97.0           |
| 240        | 99.1           |

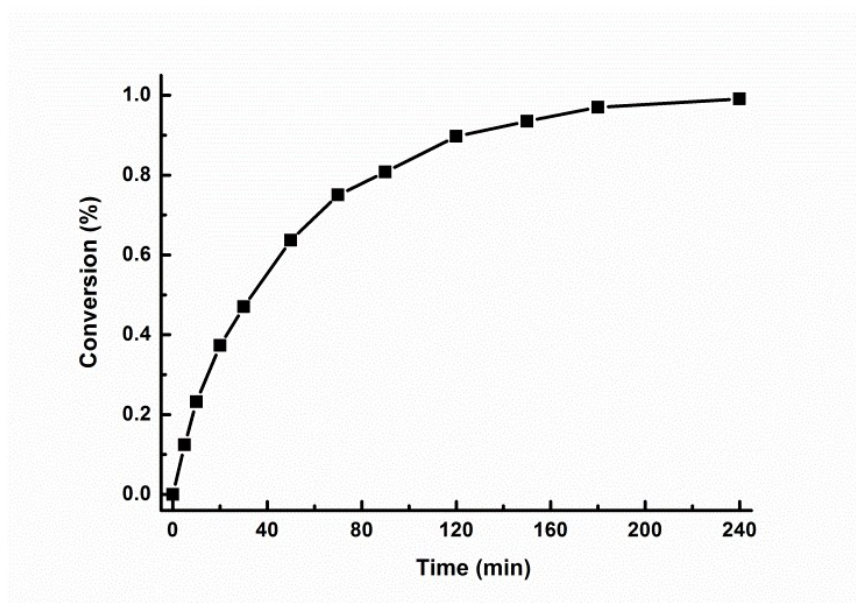

**SFig. 16** Polymerization of 2-PB with  $\text{Lu}/[(\text{Ph}_3\text{C})][(\text{B}(\text{C}_6\text{F}_5)_4)]$ : conversion vs time. ( $[\text{Lu}]_0 = 5.0 \mu\text{mol/mL}$ ,  $[\text{2-PB}]_0/[\text{Lu}]_0 = 200$ , Chlorobenzene,  $25 \text{ }^\circ\text{C}$ ).

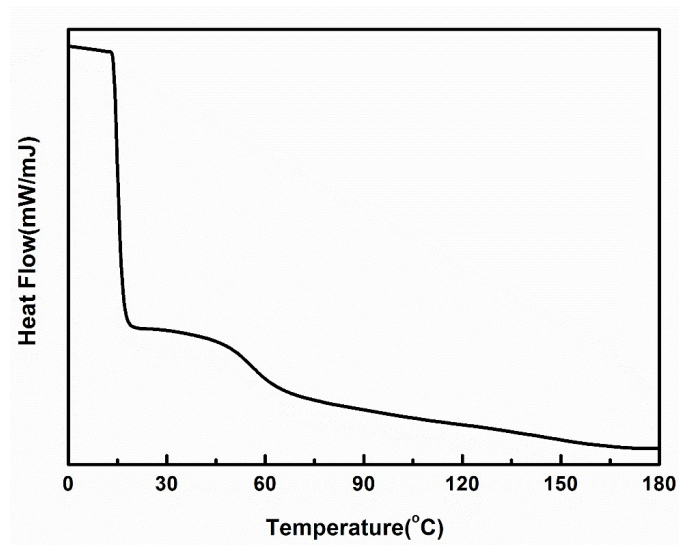

**SFig. 17** Thermogram of P(2-PB). (Table 1, entry 12)
